# Supplementary material for: Multiplex live single-cell transcriptional analysis demarcates cellular functional heterogeneity
Source: eLife. 2019 Oct 8;8:e49599. doi: 10.7554/eLife.49599 (PMC6861004; doi:10.7554/eLife.49599)
Supplement: Table 3—source data 1. [file elife-49599-table3-data1.xlsx]

## Sheet: Fig 1D
Quantification of binding affinities of purified and unpurified MAGIC Factor
	Purified	Unpurified
100	0.00689565	0.00433463
200	0.023386	0.00789644
400	0.0760376	0.0143393
800	0.218436	0.0258903
1600	0.477203	0.0462721
3200	0.726351	0.0812456
6400	0.855713	0.138476
12800	0.902241	0.22523
25600		0.342591
51200		0.479098
102400		0.61256

## Sheet: Fig 2B
Quantification of FRET/cell
	Control Probe	beta-actin MAGIC Probe
	1	8.61072
cFRET	1	18.1578
	1	16.1805
Average	1	14.3163
Std		5.03914
SEM		2.90935
	1	5.04937
cFRET/area	1	8.28674
	1	18.1326
Average	1	10.4896
Std		6.81414
SEM		3.93414

## Sheet: Fig 2C
N/C smFISH and FRET values										MOC values
	NKX+		NKX-		U2OS						Nkx+	Nkx-	U2OS
	FRET N/C	smFISH N/C	FRET N/C	smFISH N/C	FRET N/C	smFISH N/C					0.816	0.813	0.787
	0.604221	0.451514	0.357557	0.235819	0.184331	0.116689					0.864	0.786	0.875
	0.221668	0.19704	0.59476	0.55491	0.180801	0.150896					0.944	0.794	0.823
	0.363807	0.277854	0.398709	0.226934	0.249402	0.173338					0.796	0.932	0.859
	0.719079	0.528776	0.251835	0.129785	0.121962	0.105087					0.886	0.774	0.897
	1.15093	1.19175	0.190256	0.196282	0.217881	0.141384					0.773	0.766	0.887
	1.76565	1.57954	0.206124	0.149852	0.226782	0.192084					0.764	0.724	0.89
	0.807092	0.9373	0.299602	0.178707	0.265147	0.212033					0.813	0.885	0.85
	0.758367	0.677712	0.227198	0.169501	0.305816	0.192823					0.806	0.893	0.83
	0.591686	0.583483	0.443246	0.306415	0.256273	0.150535					0.795	0.762	0.811
	1.28319	1.03892	0.40882	0.237126	0.350187	0.222433					0.846	0.762	0.875
	1.68918	1.44928	0.130747	0.163873	0.260523	0.115258					0.73	0.795	0.84
	0.953083	0.754251	0.139916	0.0961104	0.344894	0.235694					0.78	0.783	0.813
	1.37765	0.95847	0.451224	0.327423	0.299333	0.138511					0.7	0.79	0.92
	0.82939	0.676989	0.727548	0.539511	0.284815	0.163108					0.795	0.997	0.94
	0.722455	0.926209	0.459314	0.340485	0.282092	0.208012					0.834	0.748	0.79
	1.38169	1.17258	0.316011	0.226372	0.370222	0.185874					0.832	0.806	0.81
	0.571204	0.461451	0.473545	0.323218	0.237235	0.124374					0.86	0.953	0.867
	0.3743	0.455144	0.53674	0.344053	0.256669	0.180057					0.955	0.791	0.835
	0.85465	0.719186	0.377649	0.319496	0.158675	0.131359					0.814	0.95	0.83
	0.389389	0.41863	0.232407	0.200621	0.419722	0.218878					0.786	0.85	0.87
	0.742848	0.538962	0.443635	0.236177	0.295542	0.13697					0.874	0.74	0.85
	0.502631	0.292893	0.506665	0.335272	0.34235	0.267432					0.882	0.78	0.92
	0.992399	0.739487	0.274813	0.162565	0.212563	0.216897						0.874
			0.456476	0.181122								0.884
			0.372631	0.152073								0.846
			0.278015	0.129883								0.914
			0.155519	0.0888437
										Average	0.823696	0.829333	0.855174
										Count	23	27	23
										SD	0.0609317	0.0741775	0.0417761
										SEM	0.0127051	0.0142755	0.00871092

## Sheet: Fig 2D
smFISH/cell vs. FRET/cell in fixed cells					smFISH/cell vs. FRET/cell in living cells
	smFISH/cell	FRET/cell			smFISH/cell	FRET/cell
	0.370002	0.327343			0.695605	0.432398
	0.208188	0.323828			1	1
	0.143255	0.119014			0.606789	0.437674
	0.0788806	0.194592			0.292722	0.164549
	0.143022	0.136213			0.259342	0.0887874
	0.0705883	0.0870078			0.174608	0.127925
	0.126655	0.195672			0.633096	0.794047
	0.509356	0.480862			0.405131	0.44772
	0.012435	0.0794818			0.336424	0.345395
	0.0170785	0.106689			0.135564	0.382718
	0.0041136	0.106069			0.503164	0.384464
	0.0907277	0.170679			0.219786	0.4435
	0.115569	0.124761			0.382706	0.575771
	0.167023	0.190033			0.309816	0.808295
	0.0954872	0.183155			0.210727	0.347813
	0.147442	0.118233			0.235652	0.35781
	0.0939632	0.179169			0.494597	0.450854
	0.057108	0.0673369			0.187474	0.440161
	0.165239	0.0938346			0.464244	0.940132
	0.0822563	0.127915			0.365146	0.777281
	0.0155477	0.087024			0.544684	0.511652
	0.0507959	0.0876335			0.286029	0.565141
	0.175982	0.0870091			0.383753	0.237421
	0.124189	0.135859			0.256296	0.331915
	0.138522	0.101381			0.180121	0.17788
	0.217998	0.288415			0.784032	0.722648
	0.0644653	0.11522			0.434377	0.579329
	0.0967201	0.10631			0.10271	0.416583
	0.217451	0.322461			0.23567	0.478362
	0.127292	0.230579			0.676025	0.846165
	0.106309	0.22697			0.361927	0.58183
	0.0804359	0.118302			0.47526	0.570741
	0.0689388	0.0984939			0.380857	0.449669
	0.0845925	0.18461			0.366745	0.435497
	0.111612	0.193463
	0.177837	0.197961
	0.138267	0.118704
	0.0978598	0.0749289
	0.124029	0.15167
	0.135484	0.150197
	0.187482	0.186187
	0.122893	0.13185
	0.206754	0.290924
	0.135199	0.200861
	0.228488	0.289254
	0.194676	0.352448
	0.191665	0.298877
	0.122627	0.226162
	0.0832805	0.172379
	0.0376646	0.171615
	0.432972	0.608003
	0.619187	0.59425
	0.667258	0.850794
	1	0.67028
	0.747055	0.66779
	0.486986	0.526669
	0.372021	0.376769
	0.329221	0.322214
	0.752114	0.898443
	0.733998	0.479578
	0.477676	0.560844
	0.39801	0.436634
	0.393063	0.387253
	0.565072	0.496969
	0.411887	0.512434
	0.486056	0.556398
	0.51231	0.459747
	0.499067	0.413672
	0.546072	0.501022
	0.468345	0.560756
	0.671064	1
	0.387325	0.37069
	0.403257	0.481871

## Sheet: Fig 3A
Quantification of cardiac subpopulations during differentiation
	d6						d7						d8						d9						d10						d11						d12						d15
	MHC- MLC2a-	MHC- MLC2a+	MHC+ MLC2a-	MHC+ MLC2a+			MHC- MLC2a-	MHC- MLC2a+	MHC+ MLC2a-	MHC+ MLC2a+			MHC- MLC2a-	MHC- MLC2a+	MHC+ MLC2a-	MHC+ MLC2a+			MHC- MLC2a-	MHC- MLC2a+	MHC+ MLC2a-	MHC+ MLC2a+			MHC- MLC2a-	MHC- MLC2a+	MHC+ MLC2a-	MHC+ MLC2a+			MHC- MLC2a-	MHC- MLC2a+	MHC+ MLC2a-	MHC+ MLC2a+			MHC- MLC2a-	MHC- MLC2a+	MHC+ MLC2a-	MHC+ MLC2a+			MHC- MLC2a-	MHC- MLC2a+	MHC+ MLC2a-	MHC+ MLC2a+
Experiment 1	0.702703	0	0.27027	0.027027		Experiment 1	0.534799	0	0.271062	0.194139		Experiment 1	0.409091	0	0.136364	0.454545		Experiment 1	0.355932	0	0.0847458	0.559322		Experiment 1	0.285714	0	0.357143	0.357143		Experiment 1	0	0	0.0789474	0.921053		Experiment 1	0.117021	0	0.0957447	0.787234		Experiment 1	0.046875	0	0	0.953125
Experiment 2	0.36	0	0.413333	0.226667		Experiment 2	0.301939	0	0.240997	0.457064		Experiment 2	0.327273	0	0.381818	0.290909		Experiment 2	0.323529	0	0.411765	0.264706		Experiment 2	0.2	0	0.145455	0.654545		Experiment 2	0.268293	0	0.243902	0.487805		Experiment 2	0.326531	0	0.22449	0.44898		Experiment 2	0.347826	0	0.0434783	0.608696
Experiment 3	0.590909	0	0.227273	0.181818		Experiment 3	0.568528	0	0.152284	0.279188		Experiment 3	0.423077	0	0.211538	0.365385		Experiment 3	0.366667	0	0.266667	0.366667		Experiment 3	0.2	0	0	0.8		Experiment 3	0.233333	0	0.25	0.516667		Experiment 3	0.0857143	0	0.214286	0.7		Experiment 3	0	0	0.0322581	0.967742
Average	0.551204	0	0.303625	0.145171		Average	0.468422	0	0.221448	0.31013		Average	0.38648	0	0.24324	0.37028		Average	0.348709	0	0.254392	0.396898		Average	0.228571	0	0.167532	0.603896		Average	0.167209	0	0.19095	0.641841		Average	0.176422	0	0.178173	0.645405		Average	0.131567	0	0.0252454	0.843188
SD	0.174767	0	0.0974118	0.104744		SD	0.145161	0	0.061755	0.134166		SD	0.0517498	0	0.125761	0.0819279		SD	0.0224573	0	0.163855	0.149617		SD	0.0494872	0	0.179592	0.225731		SD	0.145858	0	0.097045	0.242234		SD	0.130937	0	0.0715675	0.175612		SD	0.188747	0	0.0225715	0.203207
SEM	0.100902	0	0.0562407	0.0604739		SEM	0.0838089	0	0.0356543	0.0774605		SEM	0.0298778	0	0.0726079	0.0473011		SEM	0.0129658	0	0.0946015	0.0863812		SEM	0.0285714	0	0.103688	0.130326		SEM	0.0842112	0	0.0560289	0.139854		SEM	0.0755964	0	0.0413195	0.10139		SEM	0.108973	0	0.0130317	0.117322

## Sheet: Fig 3C
Quantification of cardiac subpopulations during differentiation
	d10						d15						d25						d40
	MLC2a- MLC2v-	MLC2a+ MLC2v-	MLC2a- MLC2v+	MLC2a+ MLC2v+			MLC2a- MLC2v-	MLC2a+ MLC2v-	MLC2a- MLC2v+	MLC2a+ MLC2v+			MLC2a- MLC2v-	MLC2a+ MLC2v-	MLC2a- MLC2v+	MLC2a+ MLC2v+			MLC2a- MLC2v-	MLC2a+ MLC2v-	MLC2a- MLC2v+	MLC2a+ MLC2v+
Experiment 1	0.046729	0.953271	0	0		Experiment 1	0	0.921053	0	0.0789474		Experiment 1	0	0.735409	0	0.264591		Experiment 1	0	0.322917	0.161458	0.515625
Experiment 2	0.151515	0.848485	0	0		Experiment 2	0	1	0	0		Experiment 2	0	0.846154	0	0.153846		Experiment 2	0	0.180556	0.208333	0.611111
Average	0.0991221	0.900878	0	0		Average	0	0.960526	0	0.0394737		Average	0	0.790781	0	0.209219		Average	0	0.251736	0.184896	0.563368
SD	0.074095	0.074095	0	0		SD	0	0.0558242	0	0.0558242		SD	0	0.0783087	0	0.0783087		SD	0	0.100665	0.0331456	0.0675189
SEM	0.0427788	0.0427788	0	0		SEM	0	0.0322301	0	0.0322301		SEM	0	0.0452116	0	0.0452116		SEM	0	0.0581187	0.0191366	0.038982

## Sheet: Fig 3E
Cell sizes of cardiac subpopulations
		d7	d10	d12				d15	d40
	MHCa- MLC2a-	242.386	1089.13	1263.26			MLC2a- MLC2v+		3180.96
Average	MHCa+ MLC2a-	225.193	1013.94	1330.55		Average	MLC2a+ MLC2v-	1613.56	1926.83
	MHCa+ MLC2a+	228.264	1058.88	1295.77			MLC2a+ MLC2v+	1988.71	2604.6
	MHCa- MLC2a-	106.681	424.62	494.53			MLC2a- MLC2v+		1103.17
SD	MHCa+ MLC2a-	82.6057	427.834	759.271		SD	MLC2a+ MLC2v-	486.596	339.538
	MHCa+ MLC2a+	108.203	405.985	479.075			MLC2a+ MLC2v+	782.733	646.881
	MHCa- MLC2a-	25.145	90.5293	123.633			MLC2a- MLC2v+		305.965
SEM	MHCa+ MLC2a-	22.9107	59.3299	189.818		SEM	MLC2a+ MLC2v-	99.326	82.35
	MHCa+ MLC2a+	27.9378	59.219	90.5367			MLC2a+ MLC2v+	236.003	167.024

## Sheet: Fig 3F
Calcium handling of cardiac subpopulations
	Time to peak(sec)		Time to decay (sec)		Time to 50% decay (s)		Max upstroke velocity (delta F/msec)		Max downstroke velocity (delta F/msec)
	MHCa+	MHCa-	MHCa+	MHCa-	MHCa+	MHCa-	MHCa+	MHCa-	MHCa+	MHCa-
	0.240344	0.412018	0.515023	4.5322	0.188842	1.68241	3.44197	1.03836	2.26974	1.2974
	0.171789	0.343349	0.652798	2.98713	0.223326	0.566525	4.16151	7.1567	1.57066	1.38423
	0.171789	0.103005	0.652798	1.54507	0.223326	0.618028	2.28208	1.76594	0.931174	0.484752
	0.229205	0.103555	0.309427	1.58784	0.154713	0.707626	5.12271	6.14245	2.09434	1.73892
	0.171904	0.171674	0.584472	4.87555	0.257856	1.85408	3.76455	6.06499	1.51468	0.791419
	0.20594	0.103005	1.88779	4.18885	0.497689	2.74679	9.6252	4.28287	1.80502	0.920813
	0.137523	0.206284	0.378188	5.19149	0.206284	0.859518	5.48379	5.99525	2.51284	1.16561
	0.171904	0.103005	0.343807	3.6395	0.189094	0.875539	5.48379	4.87173	2.51284	1.14887
	0.171674	0.172477	0.721032	0.655413	0.566525	0.327706	10.422	4.64187	2.8337	0.597434
	0.137339	0.13789	0.377683	1.06865	0.154507	0.396433	1.86822	2.47053	0.994537	1.09946
	0.16855	0.221589	0.456491	1.30756	0.149237	0.347949	6.12083	2.83589	2.01967	1.12645
	0.282022	0.774644	0.457828	1.21965	0.116288	0.68491	10.3234	6.93683	2.87526	2.89343
	0.22033	0.445665	0.454431	1.18259	0.175576	0.378991	5.60818	0.0941395	2.54259	0.0603456
	0.137523	0.309839	0.378188	1.06722	0.206284	0.430332	3.38911	4.574	0.943842	2.44568
Average	0.186988	0.257714	0.583568	2.50348	0.236396	0.891203	5.50696	4.20511	1.95864	1.22534
SD	0.0429504	0.189117	0.396348	1.65134	0.131112	0.711775	2.8023	2.2383	0.683113	0.743275
SEM	0.011479	0.0505437	0.105928	0.441338	0.0350411	0.19023	0.748947	0.598211	0.18257	0.198649

## Sheet: Fig 3G
Response to caffeine of cardiac subpopulations
		Caffeine-induced change of peak intensity (%)				Normalized Baseline Fluo-4 AM Intensity
		MHCa+	MHCa-			MHCa+	MHCa-
		346	64.7799			540	980
		432.061	-10.8014			540	1020
		161.283	102.241			415	730
		130.556	57.3856			503	840
		294.565	74.1325			940	1320
		151.681	32.3529			740	1860
		529.897	315.805			930	1720
		232.209	283.271			960	860
		525.926	-11.6645			1380	1050
		48.4882				800	1430
						560	780
	Average	285.267	100.834			440	650
	SD	169.678	118.957			930	770
	SEM	53.657	39.6524				1020
					Average	744.462	1077.69
					SD	279.544	373.664
					SEM	77.5314	99.8659
					Normalized	1	1.44761

## Sheet: Fig 4A
MHCalpha smFISH/cell in differentiating cells
	hPSC	d5	d8	d20
	4.18442	68.1924	217.57	239.23
	31.2485	84.6501	78.6856	192.881
	28.7838	90.0496	288.535	218.412
	26.7793	69.04	184.258	395.553
	22.5346	89.2214	243.496	444.402
	3.18321	88.717	195.36	287.736
	14.4587	49.1723	202.383	169.102
	3.98098	85.4389	330.359	184.62
	11.5709	97.1661	331.498	191.35
	12.7221	71.6545	187.692	150.99
	27.3627	35.9222	127.424	392.538
	16.2477	59.6115	156.898	434.606
	3.73606	105.483	123.758	195.834
	2.93617	73.6362	30.731	201.698
	20.5149	75.3247	108.642	414.815
	18.1102	14.9926	141.99	59.0801
	36.5266	16.9298	123.356	171.135
	21.9582	82.4323	410.718	390.713
	10.5889	54.3051	218.702	226.603
	1.32075	84.5499	32.6219	268.115
	10.2236	96.3929	55.8679	302.303
	12.265	61.152	300.787	410.972
	8.84003	63.8267	217.306	593.054
	12.2751	64.7099	203.616	753.872
	9.63525	51.0265	430.809	680.639
	43.1833	63.4553	392.114	387.21
	3.34186	77.5231	217.492	838.424
	2.17818	72.2968	110.98	334.302
	25.0971	88.8525	21.9021	268.144
	9.34283	55.2301	52.378	288.297
	23.8095	66.3393		389.102
	22.8582	97.307		367.656
	38.0427	62.1988		177.424
	22.072	75.9324		310.19
	11.16	87.8464		265.542
	33.7467	87.7191		345.623
		100.537		300.01
		87.5258		887.424
		88.5168		250.541
		57.5804		380.772
		87.7567		88.7143
		52.6936		548.351
		62.0848		529.145
		154.742		237.087
		77.7092		255.79
		95.7715		335.871
		105.403
		46.5123
		47.48
		112.372
		126.105
		98.0194
	16.8561	76.329	191.264	342.519
	11.3711	24.8215	113.303	181.525
	1.89519	3.44213	20.6862	26.7644
	36	52	30	46
smFISH/area	0.0492122	0.222846	0.558405	1
Sd	0.0331986	0.0724676	0.330793	0.529971
SEM	0.00553309	0.0100494	0.0603942	0.0781399

[truncated: 2 more sheets: Fig 4B, Fig 4C]
