# Supplementary material for: Multiplex live single-cell transcriptional analysis demarcates cellular functional heterogeneity
Source: eLife. 2019 Oct 8;8:e49599. doi: 10.7554/eLife.49599 (PMC6861004; doi:10.7554/eLife.49599)
Supplement: Table 3—source data 2. [file elife-49599-table3-data2.xlsx]

## Sheet: Fig. 2B with area
Beta-actin MAGIC Probe										Control Probe
Cell	Cell Area	Protein Channel	RNA Channel	FRET Channel	Donor SBT	Acceptor SBT	cFRET	cFRET/area		Cell	Cell Area	Protein Channel	RNA Channel	FRET Channel	Donor SBT	Acceptor SBT	cFRET	cFRET/area
1	258687	1290.09	1741.28	707.287	0.0844295	0.0691987	477.871	0.00184729		1	131056	168.062	427.834	85.479	0.0844295	0.0691987	41.684	0.000318063
2	198218	1469.59	1580.37	708.847			475.411	0.00239843		2	143541	1117.99	470.236	244.885			117.954	0.000821744
3	116648	772.008	807.197	340.133			219.096	0.00187826		3	150602	846.603	2120.69	332.757			114.53	0.000760481
4	253982	634.018	715.03	304.206			201.197	0.00079217		4	320686	2298.77	4721.57	435.819			0	0
5	250953	242.518	744.178	584.115			512.143	0.00204079		5	161197	2685.1	6044.62	619.346			0	0
6	257461	692.59	2522.18	606.718			373.711	0.00145152		6	220493	2194.69	2065.61	343.299			15.0655	6.83262e-05
7	406311	706.197	2173.72	468.614			258.571	0.000636388		7	160354	875.68	2314.48	208.111			0	0
8	180527	1428.1	3067.66	478.366			145.514	0.000806049		8	124872	1874.59	5502.01	590.878			51.8757	0.000415431
9	162724	632.635	1474.23	419.662			264.234	0.00162382		9	226700	1105.97	1611.85	192.16			0	0
10	174888	82965951	1.62329e+07	3144660	0.015	0.08	601539	3.43956		10	81387	7.52342e+07	8.11417e+06	1.8811e+06	0.015	0.08	103450	1.27109
11	242208	131366540	4.76163e+07	6.17145e+06			391641	1.61696		11	165555	78297559	3.57809e+06	9640.5			0	0
12	161640	128414176	24909749	4804238			885245	5.47665		12	440208	1.53596e+08	2.16764e+06	2154507			0	0
13	17160	19669528	1879443	624192	0.0195267	0.0909093	69253.1	4.03573		13	7101	1.70863e+06	2.57028e+06	241332	0.0195267	0.0909093	0	0
14	12203	3.02784e+07	1.4457e+07	1888434			0	0		14	4510	2838724	4870180	442164			0	0
15	30702	4.45168e+07	2.22427e+06	1.07783e+06			6362.39	0.20723		15	14759	7.49244e+06	1.33473e+07	1.3729e+06			13208.4	0.894938
16	17715	9204559	1.26498e+07	1.4608e+06			131074	7.39901		16	16331	1.82437e+07	2.90148e+06	665833			45823.4	2.80592
17	11190	5323710	2571439	421818			84096	7.51528		17	12183	2388307	3.63547e+06	359222			0	0
18	14014	9.26196e+06	7333628	859188			11637.4	0.830415		18	11869	6.67021e+06	3.7622e+06	420597			0	0
19	9366	5.58822e+06	8.67075e+06	995746			98374	10.5033		19	29870	39378462	6294118	1333396			0	0
20	10749	3.66326e+06	4.28769e+06	484918			23595.1	2.1951		20	23687	1.02606e+07	2.75195e+06	425938			0	0
21	13147	3.62446e+07	4.66198e+06	1.26419e+06			132641	10.0891		21	31871	19300968	810061	452572			2046.58	0.0642145
22	13495	4137149	8.78427e+06	1020854			141497	10.4852		22
23	15237	3.43042e+07	17010498	2.7729e+06			556636	36.5318		23
24	25014	36936786	1.23271e+07	2.00568e+06			163786	6.54776		24
25	3766	1470535	2.93571e+06	304159			8561.13	2.27327		25

## Sheet: Fig. 2B
Beta-actin MAGIC Probe								Control Probe
Cell	Protein Channel	RNA Channel	FRET Channel	Donor SBT	Acceptor SBT	cFRET		Cell	Protein Channel	RNA Channel	FRET Channel	Donor SBT	Acceptor SBT	cFRET
1	1290.09	1741.28	707.287	0.0844295	0.0691987	477.871		1	168.062	427.834	85.479	0.0844295	0.0691987	41.684
2	1469.59	1580.37	708.847			475.411		2	1117.99	470.236	244.885			117.954
3	772.008	807.197	340.133			219.096		3	846.603	2120.69	332.757			114.53
4	634.018	715.03	304.206			201.197		4	2298.77	4721.57	435.819			0
5	242.518	744.178	584.115			512.143		5	2685.1	6044.62	619.346			0
6	692.59	2522.18	606.718			373.711		6	2194.69	2065.61	343.299			15.0655
7	706.197	2173.72	468.614			258.571		7	875.68	2314.48	208.111			0
8	1428.1	3067.66	478.366			145.514		8	1874.59	5502.01	590.878			51.8757
9	632.635	1474.23	419.662			264.234		9	1105.97	1611.85	192.16			0
10	82965951	1.62329e+07	3144660	0.015	0.08	601539		10	7.52342e+07	8.11417e+06	1.8811e+06	0.015	0.08	103450
11	131366540	4.76163e+07	6.17145e+06			391641		11	78297559	3.57809e+06	9640.5			0
12	128414176	24909749	4804238			885245		12	1.53596e+08	2.16764e+06	2154507			0
13	19669528	1879443	624192	0.0195267	0.0909093	69253.1		13	1.70863e+06	2.57028e+06	241332	0.0195267	0.0909093	0
14	3.02784e+07	1.4457e+07	1888434			0		14	2838724	4870180	442164			0
15	4.45168e+07	2.22427e+06	1.07783e+06			6362.39		15	7.49244e+06	1.33473e+07	1.3729e+06			13208.4
16	9204559	1.26498e+07	1.4608e+06			131074		16	1.82437e+07	2.90148e+06	665833			45823.4
17	5323710	2571439	421818			84096		17	2388307	3.63547e+06	359222			0
18	9.26196e+06	7333628	859188			11637.4		18	6.67021e+06	3.7622e+06	420597			0
19	5.58822e+06	8.67075e+06	995746			98374		19	39378462	6294118	1333396			0
20	3.66326e+06	4.28769e+06	484918			23595.1		20	1.02606e+07	2.75195e+06	425938			0
21	3.62446e+07	4.66198e+06	1.26419e+06			132641		21	19300968	810061	452572			2046.58
22	4137149	8.78427e+06	1020854			141497
23	3.43042e+07	17010498	2.7729e+06			556636
24	36936786	1.23271e+07	2.00568e+06			163786
25	1470535	2.93571e+06	304159			8561.13

## Sheet: Fig. 2C
U2OS Cells								Nkx+ Cells								Nkx- Cells
Cell	Protein Channel	RNA Channel	FRET Channel	Donor SBT	Acceptor SBT	FRET		Cell	Protein Channel	RNA Channel	FRET Channel	Donor SBT	Acceptor SBT	FRET		Cell	Protein Channel	RNA Channel	FRET Channel	Donor SBT	Acceptor SBT	FRET
1	2346620	8505283	3322889	0.7	0.17	234357		1	1319959	2311054	1517123	0.7	0.17	200273		1	661320	988375	698168	0.7	0.17	67220.3
2	1985540	7363699	2976857			335150		2	1.82448e+06	2.96124e+06	1893231			112687		2	684202	944384	714465			74978.3
3	3224811	10650519	4429126			361170		3	882396	1215877	901917			77540.5		3	1913843	2646905	1907661			117997
4	2481628	8396769	3705865			541275		4	934353	1019830	870114			42696.1		4	470878	561382	459943			34893.5
5	2399111	8010573	3445537			404362		5	973057	1082276	942541			77414.2		5	717192	960291	717636			52352.1
6	1850225	5260532	2453041			263593		6	583151	812357	584514			38207.7		6	1716598	2129357	1.68131e+06			117701
7	1328763	4164854	1839525			201366		7	1354374	1682458	1302635			68555.3		7	1041500	1565425	1064072			68899.8
8	1127529	3517945	1565520			178199		8	3644320	4416255	3577489			275702		8	708990	1005924	724843			57542.6
9	2717173	8817093	3808027			407100		9	665342	921711	629161			6730.73		9	599146	832470	604460			43537.9
10	1686975	5869453	2575984			397294		10	929167	1154882	855991			9244.16		10	396537	687625	431787			37314.9
11	1711997	5966595	2471273			258554		11	994654	1284933	916923			2226.59		11	661603	1123242	699861			45787.8
12	1523010	4922636	2118388			215433		12	1290469	1738830	1248038			49108.6		12	830151	1382986	876626			60412.7
13	1228000	4903870	1906013			212755		13	702699	1089112	739593			62554.7		13	895937	1171377	922549			96258.7
14	1790113	6033874	2584697			305859		14	1019035	1364285	1035658			90405		14	819962	1.25349e+06	861908			74840.4
15	1774451	6249091	2527405			222944		15	1435856	1733153	1351420			51684.8		15	620604	971235	652502			52969.1
16	1732113	6527590	2585259			263090		16	765393	1091478	801133			79806.6		16	753969	1430638	838121			67133.9
17	1510031	5201064	2218503			277300		17	625500	1385183	724191			50859.9		17	874054	1516292	942942			73334.2
18	1603140	5570351	2339290			270132		18	625098	1014363	640921			30911.1		18	1099385	2198210	1.24474e+06			101479
19	1416657	5005196	2138118			295575		19	944273	1686249	1037093			89439.6		19	724600	1163155	771475			66518.7
20	1861582	6219137	2613864			253503		20	1077699	2073685	1151439			44523.3		20	1126103	1331431	1126526			111911
21	3223380	11665072	4602658			363230		21	596756	977325	592290			8415.55		21	656793	950976	694601			73180
22	1424928	4772867	2018486			209649		22	795702	1587124	854297			27494.5		22	1223152	1736365	1275063			123675
23	1972574	6000627	2619181			218273		23	861153	1858468	1014001			95254.3		23	1482557	1995316	1482367			105373
																24	666556	2179480	940844
																25	1382321	1275569	1.25085e+06
																26	591317	1141137	652993
																27	534723	1218047	601761

## Sheet: Fig. 3F
MHC+ Cells								MHC- Cells
Cell	Protein Channel	RNA Channel	FRET Channel	Donor SBT	Acceptor SBT	FRET		Cell	Protein Channel	RNA Channel	FRET Channel	Donor SBT	Acceptor SBT	FRET
1		286.789	148.914		0.0691987	129.069		1		37.389	11.272		0.0691987	8.68473
2		162.685	119.404			108.146		2		90.156	25.637			19.3983
3		322.456	161.305			138.991		3		134.345	38.093			28.7965
4		93.567	54.458			47.9833		4		25.88	11.542			9.75114
5		232.042	124.172			108.115		5		130.383	19.234			10.2117
6		89.04	49.127			42.9655		6		21.41	16.894			15.4125
7		128.849	60.878			51.9618		7		85.498	24.187			18.2706
8		68.248	38.024			33.3013		8		107.279	25.942			18.5184
9		71.502	48.566			43.6182		9		72.486	24.488			19.4721
10		73.921	39.47			34.3548		10		132.332	25.272			16.1148
11		86.912	42.247			36.2328		11		334.946	36.442			13.2642
12		159.198	46.161			35.1447		12		211.078	20.016			5.40967
13		229.369	46.304			30.432		13		97.517	11.314			4.56595
14		303.007	76.179			55.2113		14		110.37	15.221			7.58353

## Sheet: Fig. 3G
MHC+ Cells								MHC- Cells
Cell	Protein Channel	RNA Channel	FRET Channel	Donor SBT	Acceptor SBT	FRET		Cell	Protein Channel	RNA Channel	FRET Channel	Donor SBT	Acceptor SBT	FRET
1		31.1	23		0.07	20.823		1		22.8	6.8		0.07	5.204
2		75.2	28.7			23.436		2		34	10.3			7.92
3		31	15.6			13.43		3		24.6	5.1			3.378
4		60.6	22.7			18.458		4		27.8	8.5			6.554
5		146.7	47.2			36.931		5		37.1	10.8			8.203
6		26.4	15.8			13.952		6		36.7	9.6			7.031
7		21.1	13.6			12.123		7		14.7	7			5.971
8		36.1	24.9			22.373		8		14.3	7.4			6.399
9		29	16.5			14.47		9		14.4	8.6			7.592
10		51.1	25.1			21.523

## Sheet: Fig. 4B
hPSC								Day 5								Day 8								Day 20
Cell	Protein Channel	RNA Channel	FRET Channel	Donor SBT	Acceptor SBT	FRET	FRET/area	Cell	Protein Channel	RNA Channel	FRET Channel	Donor SBT	Acceptor SBT	FRET	FRET/area	Cell	Protein Channel	RNA Channel	FRET Channel	Donor SBT	Acceptor SBT	FRET	FRET/area	Cell	Protein Channel	RNA Channel	FRET Channel	Donor SBT	Acceptor SBT	FRET	FRET/area
1	1052446	534682	1137176	0.95	0.25	3681.8	7.27628	1	1215736	857329	805875	0.43	0.3	25909.8	27.711	1	842950	820703	511452	0.3	0.29	20563.1	10.1296	1	324253	1187058	511193	0.3	0.29	69670.3	76.3929
2	920650	808786	1094608			17794	32.7096	2	2331376	1841262	1557602			2731.72	2.81331	2	1874350	778290	853728			65718.9	60.2926	2	90611	2510438	826559			71348.7	57.3082
3	1896877	715830	1988444			7453.35	6.16489	3	952465	1670981	847556			0	0	3	182986	628587	250570			13384	35.5957	3	1988110	1063534	983471			78613.1	116.464
4	1954871	810845	2018705			0	0	4	422139	272479	279448			16184.5	21.3516	4	467846	519482	311575			20571.4	24.8147	4	454754	690209	405785			69198.2	69.1291
5	996704	191752	975043			0	0	5	196775	652173	267840			0	0	5	267710	944144	371581			17466.2	19.4285	5	1902475	1257373	981622			46241.3	44.0813
6	2249660	508941	2267296			2883.75	3.33767	6	329112	2212827	817053			11686.7	9.10182	6	308969	1287144	488242			22279.5	39.0185	6	1793978	1326717	936500			13558.7	4.91969
7	1929920	207055	1886355			1167.25	1.59243	7	920256	1078108	726312			7169.52	8.17505	7	329134	304083	211362			24437.7	28.35	7	522523	466833	328407			36268.5	25.204
8	1517918	850225	1622059			0	0	8	1096668	925165	748762			0	0	8	628836	269959	309912			42973.1	40.0868	8	1151010	785923	641948			68727.3	36.1533
9	1283008	2126288	1746614			0	0	9	608171	680292	477576			11974.9	17.9265	9	810545	803109	507650			31584.9	21.7527	9	2419761	528920	983720			104405	47.7607
10	2748653	1512036	2984287			0	0	10	1923224	1357561	1286823			52568.4	29.7838	10	309053	831685	370855			36950.4	35.6321	10	2263935	1366819	1172583			97025	53.6643
11	1193547	47812	1149782			3959.35	4.27114	11	1741195	298718	818980			0	0	11	808480	709939	482544			34117.7	35.688	11	1385958	1013750	820607			110832	111.054
12	958872	27083	915164			0	0	12	1584830	422389	809847			1653.4	2.80713	12	3499931	709368	1315255			59559	37.6004	12	1926803	1317225	1131762			171726	108.072
13	2078314	-30942	1945986			0	0	13	666016	264496	362444			0	0	13	335332	459258	255654			21869.6	22.9001	13	419153	3155921	1215134			174171	115.345
																14	667652	319310	351945			59049.5	41.2069	14	3221859	1472458	1590462			196891	101.386
																15	1032753	1266305	705945			28890.7	10.7761	15	1318024	449492	634253			108493	52.2858
																								16	130950	2017877	758881			134412	175.243
																								17	453976	1512704	653001			78124	69.3819
																								18	1606803	2008074	1159374			94991.6	56.5763
																								19	543505	1145802	537246			41911.9	65.8992
																								20	722071	1095195	597829			63601.2	98.4538
																								21	1249208	1357593	821367			52902.6	47.4463
																								22	1011750	918155	634190			64400.1	86.9096
																								23	1280463	1198107	813594			82004.1	58.2415
																								24	775824	628963	457999			42852.5	66.9571

## Sheet: Fig. 4C
MHCa								MLC2a
Cell	Protein Channel	RNA Channel	FRET Channel	Donor SBT	Acceptor SBT	FRET		Cell	Protein Channel	RNA Channel	FRET Channel	Donor SBT	Acceptor SBT	FRET
1	25407184	9842525	11213661	0.3	0.29	737174		1	4590260	2393059	2659340	0.3	0.29	588275
2	12585089	2536418	4822300			311212		2	6288572	4800985	4742778			1.46392e+06
3	5379830	2119238	2420422			191894		3	4192462	2466975	2319236			346075
4	4573086	1494174	1941282			136046		4	4860147	3137303	2817737			449875
5	4520112	1721307	2054751			199538		5	2608063	2027897	1727559			357050
6	6397685	1676358	2679001			273552		6	4874179	3498075	3493309			1.01661e+06
7	4815481	1652076	2542142			618396		7	5694413	2959214	2747857			181361
8	4551286	2368762	3066138			1.01381e+06		8	2828479	2086573	1818652			365002
9	4402568	2128902	2477176			539024		9	4466243	2289384	2227887			224093
10	2434479	1468587	1614405			458171		10	3995962	3536883	2701622			477137
11	9674369	8615924	6578979			1.17805e+06		11	4649708	3734086	3092783			614986
12	4971080	2914963	2623467			286804		12	8280374	9344319	6857850			1.66389e+06
13	5971290	3198176	3657229			938371		13	3777766	5302617	4015826			1.34474e+06
14	2923837	1443347	1731785			436063		14	6419379	11178043	7167972			2.00053e+06
15	3157753	1390334	1649953			299430		15	4691025	6588476	4916492			1.59853e+06
16	5216422	3089711	3315396			854453		16	2648523	3048602	2038763			360112
17	5558595	3530620	3780377			1.08892e+06		17	4232320	5481169	3648638			789403
18	2935491	1973857	1795344			342278		18	7184609	4745696	4373921			842286
19	4837774	2810924	2868591			602091		19	5970826	6444632	4593013			932822
20	3950400	2651294	2509461			555466		20	4974345	4223674	3383769			666600
21	5053480	3231793	3020872			567608		21	7407496	3946008	4099482			732891
22	6991114	3213137	3627465			598321		22	3397427	2522298	2580439			829744
23	5000999	2327238	2916651			741452		23	2595925	1977005	2068574			716465
24	1804528	544012	854200			155078		24	4103141	3063649	2641895			522494
25	5587776	8171893	5922623			1.87644e+06		25	3055785	1993319	2328960			834162
26	5535494	6333577	4713296			1.21591e+06		26	4277371	2635060	2723311			675932
27	6059433	5284448	4385577			1.03526e+06		27	5564588	5042457	3895508			763819
28	7161282	4889147	4728878			1.16264e+06		28	2419688	2714484	2530153			1.01705e+06
29	5205378	3032436	3189964			748944		29	2956786	3705182	3277322			1.31578e+06
30	4784259	3011840	2839440			530729		30	3041332	1770880	2188975			763020
31	2591210	1862326	1704845			387407		31	7085519	4758753	4838136			1.33244e+06
32	2697767	1964337	1605212			226224		32	6176598	8913364	5780709			1.34285e+06
33	3168071	2126001	1930675			363713		33	6091946	6954645	5208354			1.36392e+06
34	1943141	1314424	1208627			244502		34	6204230	5872371	5218862			1.65461e+06
35	2571159	1757936	1573951			292802		35	1321202	2244321	1554088			506874
36	4585361	3134837	2570931			286220		36	1098630	1466144	1420287			665516
37	3937290	2755275	2216544			236327		37	2782246	4206922	2502797			448116
38	2732424	1269487	1437177			249299		38	1754587	1363525	1145142			223344
39	5270472	3892704	3379437			669411		39	2386983	4137269	2969722			1.05382e+06
40	4135801	2957443	2334098			235699		40	1505765	4158755	2664074			1.00631e+06
41	2405208	2998345	2049280			458198		41	3605055	4230703	3735266			1.42685e+06
42	2944908	3088917	2674624			895366		42	2479205	3028275	2654176			1.03221e+06
43	2464935	3821435	2361522			513825		43	3625259	5008209	3400046			860088
44	13025433	10667989	8609596			1.60825e+06		44	1121808	1952995	1123410			220499
45	5778675	4583295	3756780			694022		45	4182769	4600621	4004024			1.41501e+06
								46	4151110	4068666	3647853			1.22261e+06
								47	6769676	8336562	5677726			1.22922e+06
								48	1207408	3806930	2574940			1.10871e+06
								49	1033759	3156997	2246866			1.02121e+06
								50	1092217	2672832	2202505			1.09972e+06

## Sheet: Fig. 5B
hPSC								Day 5								Day 8								Day 20
Cell	Protein Channel	RNA Channel	FRET Channel	Donor SBT	Acceptor SBT	FRET	FRET/area	Cell	Protein Channel	RNA Channel	FRET Channel	Donor SBT	Acceptor SBT	FRET	FRET/area	Cell	Protein Channel	RNA Channel	FRET Channel	Donor SBT	Acceptor SBT	FRET	FRET/area	Cell	Protein Channel	RNA Channel	FRET Channel	Donor SBT	Acceptor SBT	FRET	FRET/area
1	1944544	877933	2027697	0.99	0.25	0	0	1	376632	338391	287119	0.43	0.3	23649.9	40.8462	1	798203	893436	555439	0.33	0.29	32935.6	39.1624	1	2055972	1784905	1245146	0.33	0.29	49052.8	33.4147
2	1602033	1270079	1900646			0	0	2	290813	752389	358938			8171.71	21.5612	2	195362	1731281	713205			146664	108.801	2	357806	827368	392978			34965.3	46.4347
3	779245	810012	973781			0	0	3	509512	491759	406679			40061.1	74.0502	3	513043	27312	170022			0	0	3	2923808	1887420	1749710			237502	150.508
4	1584629	3655183	2574267			91688.5	43.4337	4	832305	854714	622982			8676.65	14.437	4	627181	517565	336293			0	0	4	909337	752022	695950			177782	146.806
5	1823898	1214640	2110727			1407.98	1.40939	5	909376	284694	511312			34872.1	66.5498	5	126936	372557	162056			12125.6	30.1632	5	212034	173703	141830			21484.9	73.3273
6	2032800	2825719	2739984			21082.2	9.53948	6	1613655	950942	1036934			57779.8	93.6463	6	256720	873815	350364			12240.1	11.9299	6	262068	160998	137230			4058.14	8.5255
7	1941046	1674425	2348676			8434.21	7.88981	7	2806577	777384	1443087			3043.69	1.88347	7	1339798	2120312	1095321			38297.2	21.1704	7	1033332	2937760	1297509			104559	91.4777
8	607330	275680	674827			4650.3	21.7304	8	284119	1381419	554126			17529.1	26.7212	8	459960	1166543	559853			69768.7	67.4094	8	415438	1798848	835496			176736	184.484
9	1464383	1406607	1813530			12139.1	12.6317	9	1474421	3819196	1745470			0	0	9	59108	248807	120285			28625.3	117.317	9	1479351	733955	709037			8004.22	9.59739
10	1009025	858050	1221096			7648.75	12.6635	10	528979	1501281	726974			49128.7	63.8865	10	435258	518427	303661			9682.03	43.4172	10	532954	1447299	558032			0	0
11	728276	435853	830927			970.51	2.82948	11	1768315	1512163	1256471			42446.7	28.3734	11	814646	3014044	1231041			88135.1	73.5685	11	1912492	3327977	1799558			203322	120.881
12	1688371	1733604	2110467			5578.71	6.74572	12	168273	670369	298065			24596.9	41.7605	12	1629337	1537145	1089117			105664	123.295	12	2206180	1308291	1073020			0	0
13	814821	369198	901452			2479.71	4.14667	13	283579	1495056	589901			19445.2	36.62	13	413773	1057949	482353			39002.7	59.095	13	309313	2099112	771851			61035.2	46.2038
14	1737700	467699	1868232			30984.2	24.7676	14	2728514	611453	1330785			0	0	14	5179424	1450157	2131462			1706.55	0.880119	14	1296174	3010138	1409037			108360	76.5251
15	1164505	54239	1172777			6357.3	7.78127	15	450255	1379643	814888			207385	133.11	15	439397	632401	361462			33064.7	60.4473	15	546552	1003843	497933			26456.4	24.9824
16	741807	74919	720679			0	0	16	355248	1160702	517264			16296.8	23.3478	16	443708	1231562	616045			112468	113.147	16	767446	2207996	1205600			312024	148.23
17	266244	247757	327852			2331.19	6.93807	17	247750	371557	191816			0	0	17	1718927	2397547	1446106			183571	85.3027	17	814668	2173126	962834			63787	43.991
18	1941696	773558	2028698			0	0	18	1734728	992815	1094003			50225.5	65.7401	18	567814	1181936	558667			28526.9	55.9352	18	1272654	2956276	1466989			189693	134.249
19	681184	458805	804936			15862.6	27.7318	19	1156768	3411413	1563752			42917.9	22.3298	19	757339	2301809	1087371			169925	130.611	19	1911525	3098221	1616410			87122.7	52.9299
20	1345697	30615	1340523			629.22	0.784564	20	91689	754469	313394			47627	128.375									20	2615189	263156	899034			0	0
																								21	1753316	176659	579955			0	0
